# Supplementary material for: Amino Acid Profiles and Biopotentiality of Hydrolysates Obtained from Comb Penshell (Atrina pectinata) Viscera Using Subcritical Water Hydrolysis
Source: PubMed Central journal article supplement (PMC7999596; doi:10.3390/md19030137), 2021-03-01
Supplement: marinedrugs-19-00137-s001.pdf [file marinedrugs-19-00137-s001.pdf]

# Amino acid profiles and bio-potentiality of hydrolysates obtained from comb pen shell (*Atrina pectinata*) viscera using subcritical water hydrolysis

Hee-Jeong Lee, Vikash Chandra Roy, Truc Cong Ho, Jin-Seok Park, Yu-Rin Jeong, Seung-Chan Lee, Sung-Yeol Kim, Byung-Soo Chun\*

## Supplementary file

Table S1. Proximate composition of lyophilized *Atrina pectinata* powder

| composition   | Content (%)         |
|---------------|---------------------|
|               | <i>A. pectinata</i> |
| Crude lipid   | 9.60 ± 0.13         |
| Crude protein | 60.70 ± 0.11        |
| Moisture      | 2.50 ± 0.02         |
| Ash           | 17.20 ± 0.05        |
| Carbohydrate  | 9.98 ± 0.05         |

Values are expressed as mean ± SD.

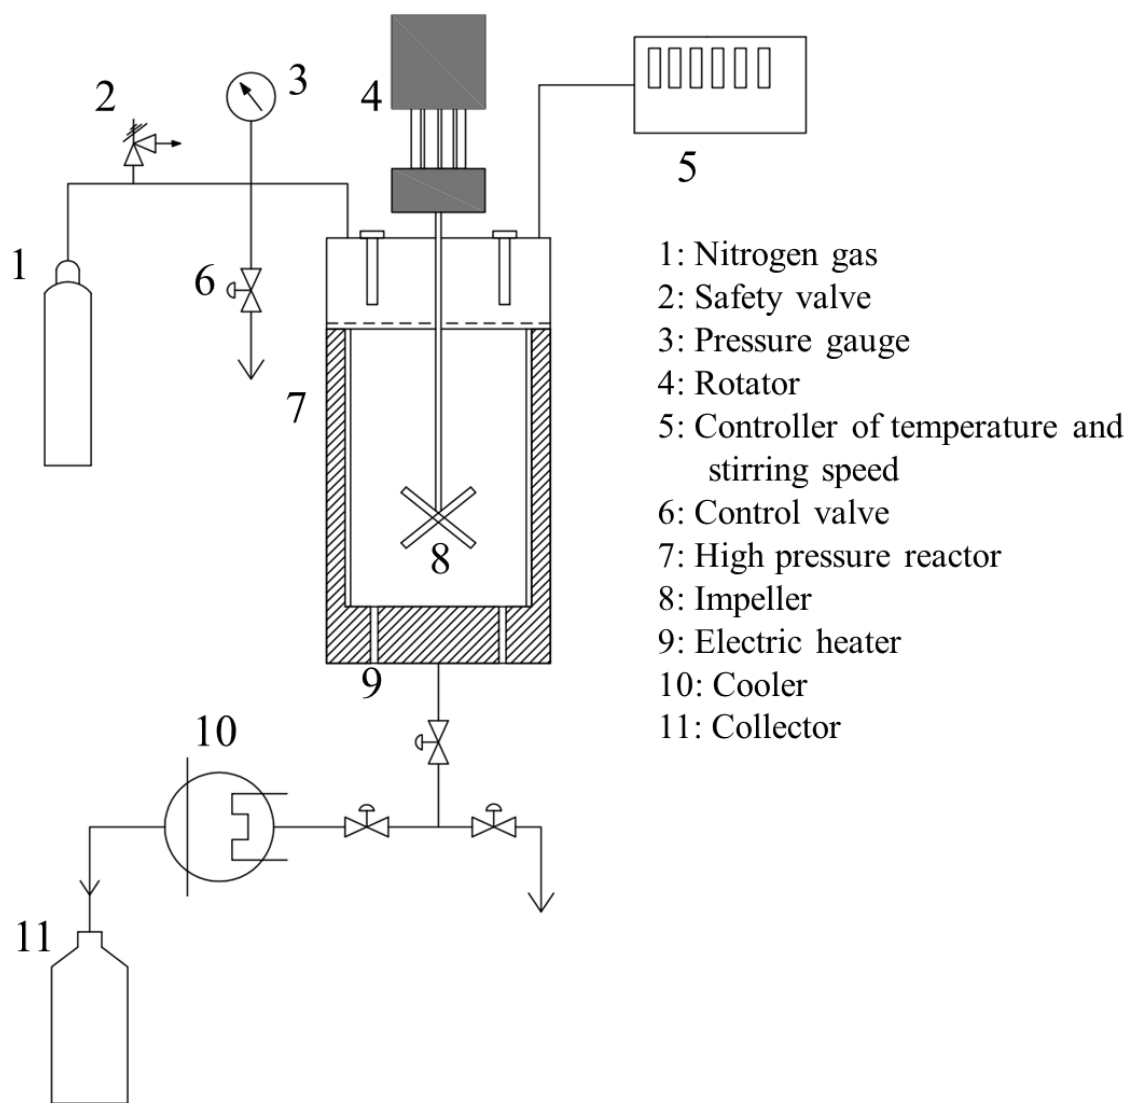

**Figure S1.** Schematic diagram of laboratory scale subcritical water hydrolysis system used in this experiment

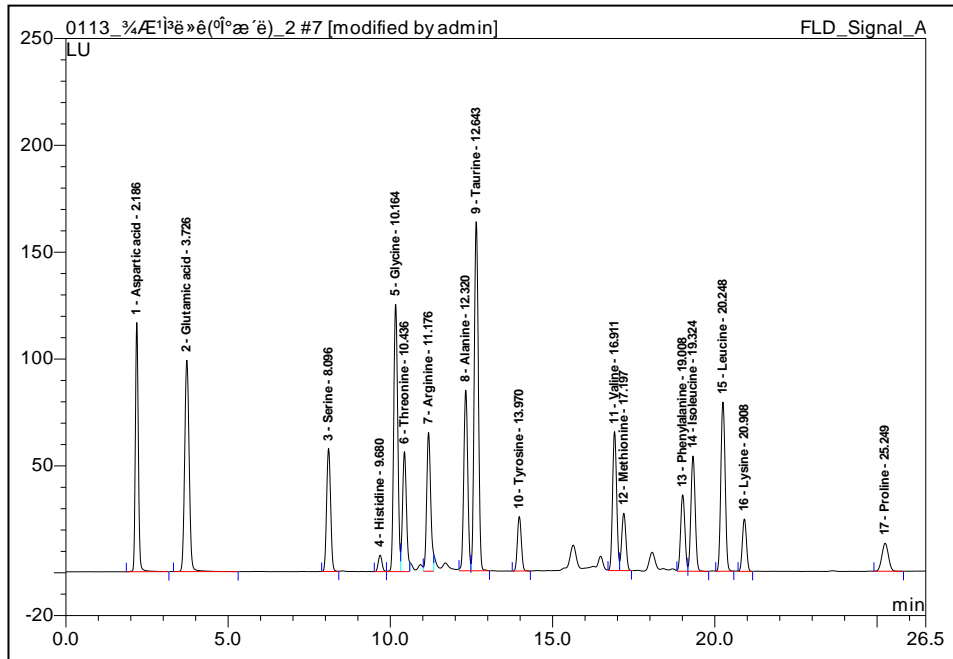

Figure S2. Chromatogram of total amino acids from the raw *A. pectinata* powder

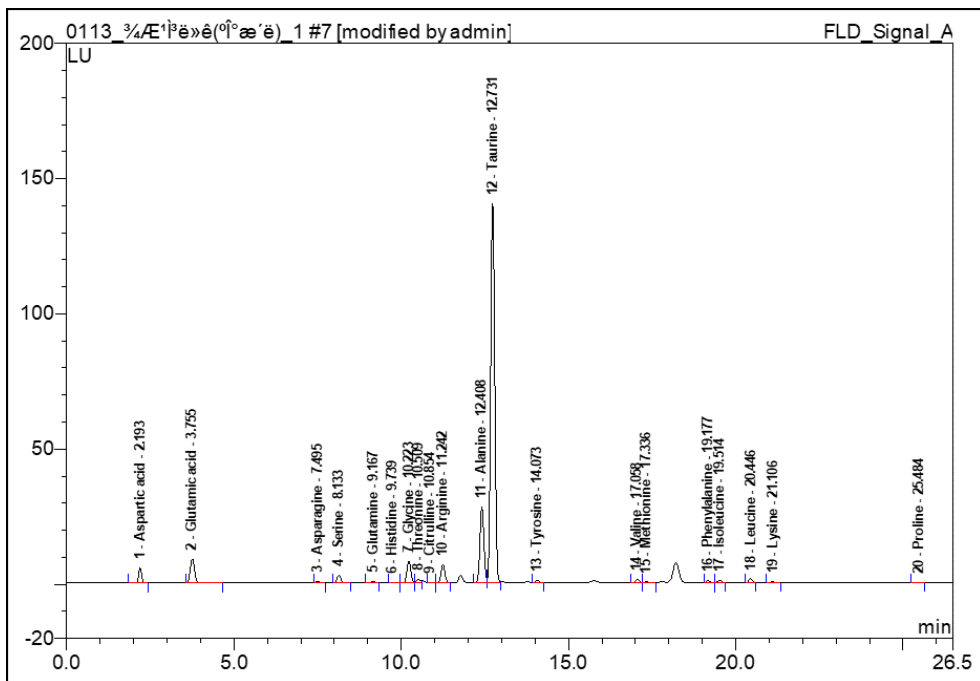

Figure S3. Chromatogram of free amino acids from the raw *A. pectinata* powder

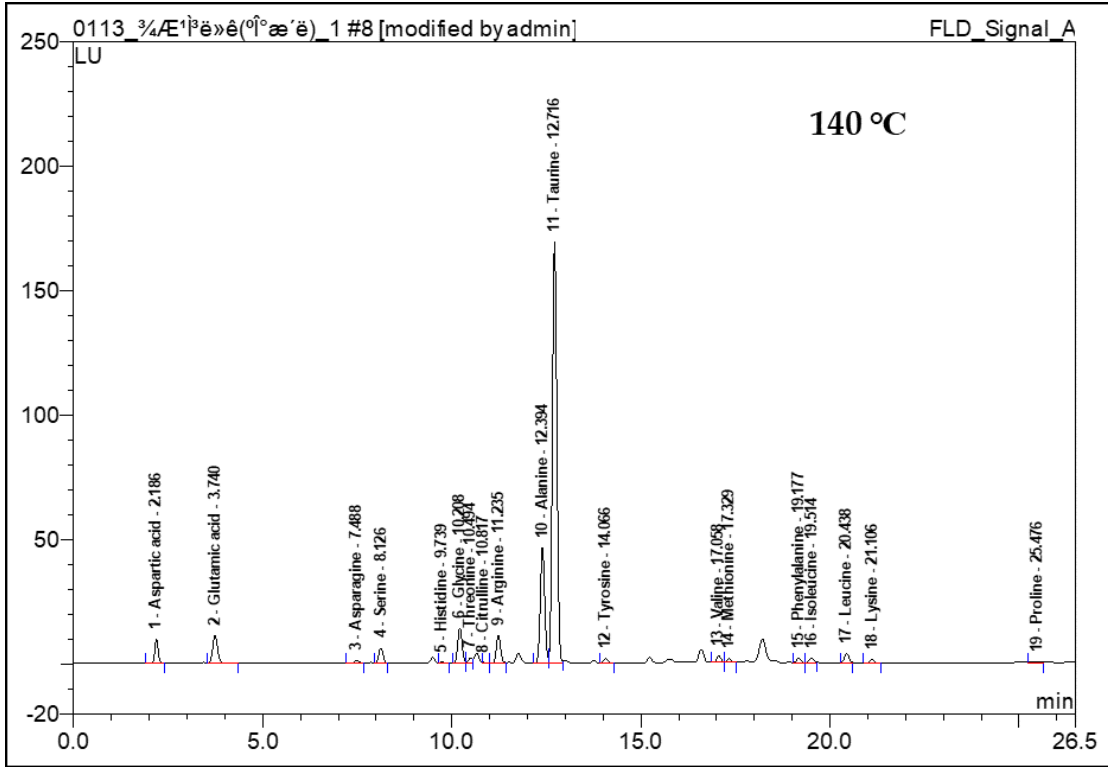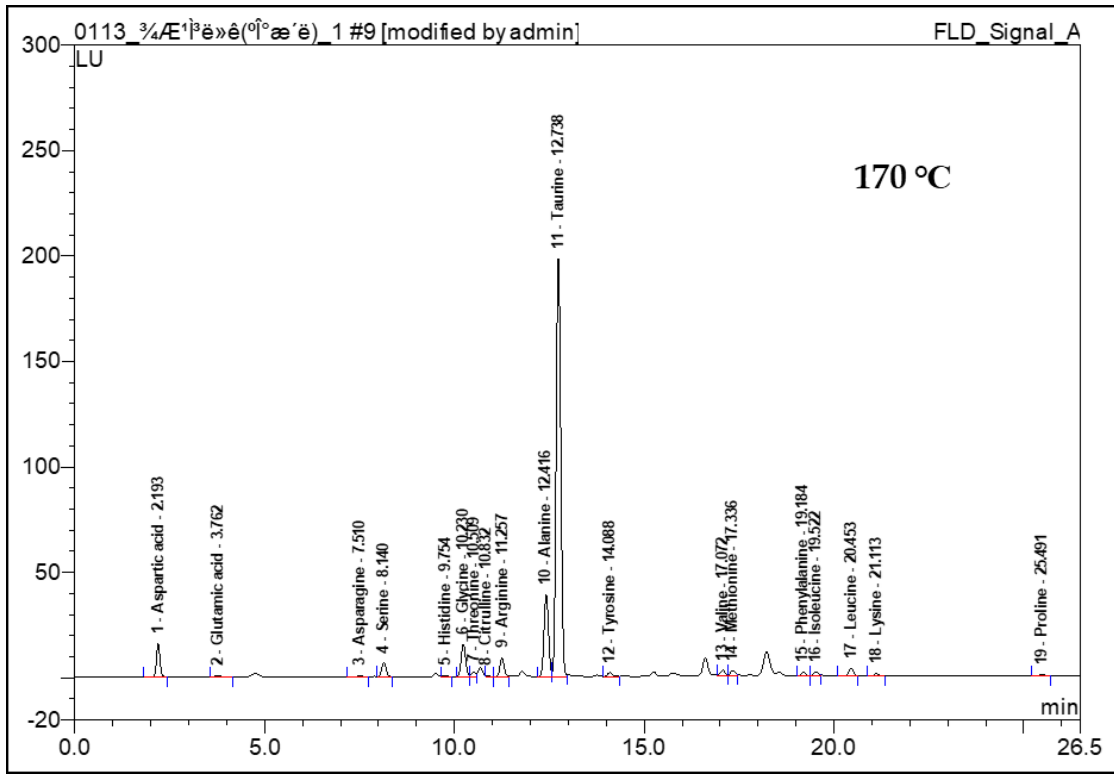

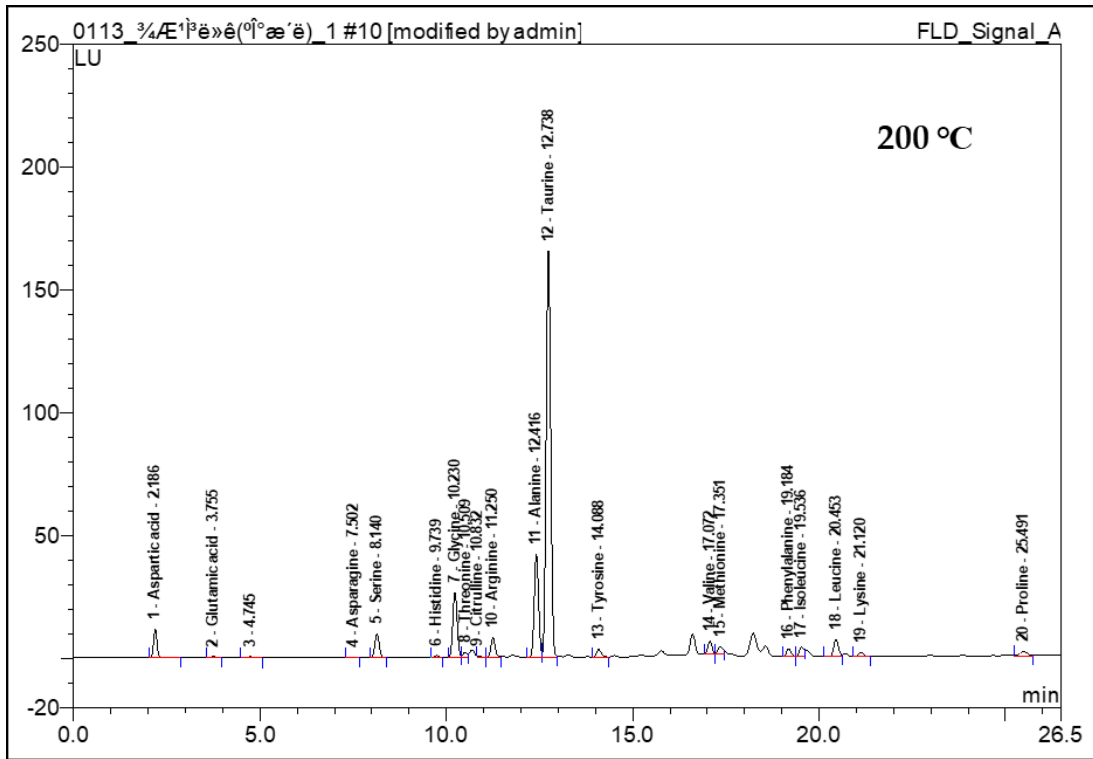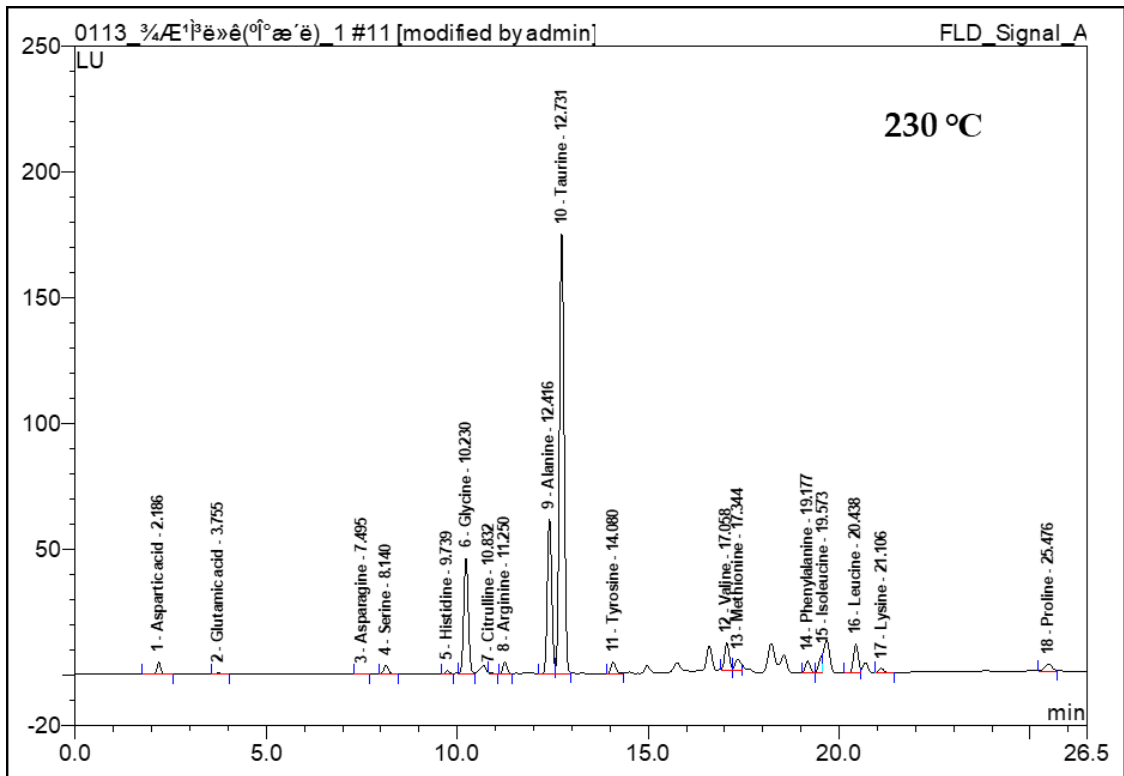

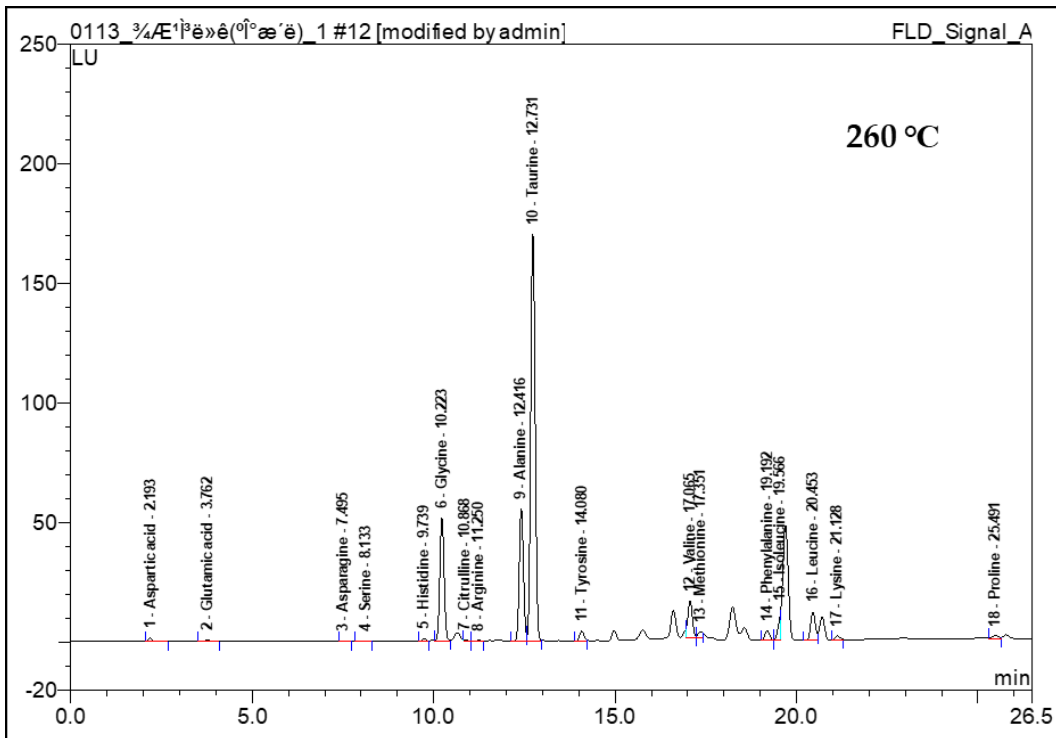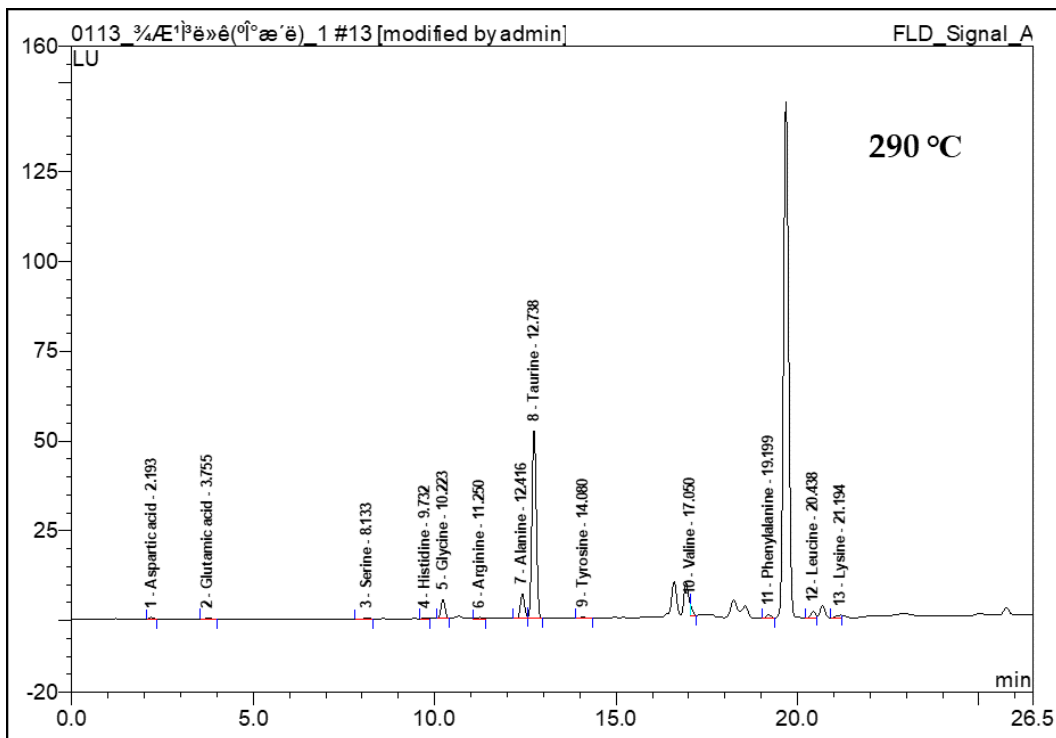

**Figure S4.** Chromatogram of amino acids obtained from *A. pectinata* powder at different subcritical extraction temperature.
